# Supplementary material
Source: ML conference proceedings conference paper supplement (https://openreview.net/forum?id=FWWZgavvBe)
Supplement: supplementary_material [file appendix.pdf › supplement/appendix.pdf]

# Technical Appendix to “Beyond the Average: Distributional Causal Inference under Imperfect Compliance”

The Appendix is structured as follows. Section A provides a table summarizing the notation. Section B introduces some definitions. Section C presents all proofs. Section D discusses the construction of confidence intervals. Section E presents some additional experimental details.

## A Summary of Notation

Table 1: Summary of Notation

|                            |                                                                                                                                |
|----------------------------|--------------------------------------------------------------------------------------------------------------------------------|
| $X_i$                      | pre-treatment covariates                                                                                                       |
| $S_i$                      | stratum indicator                                                                                                              |
| $D_i$                      | actual treatment received                                                                                                      |
| $Z_i$                      | treatment assignment                                                                                                           |
| $Y_i$                      | outcome variable                                                                                                               |
| $Y_i(d)$                   | potential outcome for treatment group $d \in \{0, 1\}$                                                                         |
| $D_i(z)$                   | potential treatment choice under assignment $z \in \{0, 1\}$                                                                   |
| $p(s)$                     | proportion of stratum $s \in \mathcal{S}$                                                                                      |
| $\pi_z(s)$                 | treatment assignment probability for treatment group $z \in \{0, 1\}$ in stratum $s \in \mathcal{S}$                           |
| $n$                        | sample size                                                                                                                    |
| $n_z(s)$                   | number of observations in treatment group $z \in \{0, 1\}$ in stratum $s$                                                      |
| $n(s)$                     | number of observations in stratum $s \in \mathcal{S}$                                                                          |
| $\hat{p}(s)$               | $n(s)/n$ , proportion of stratum $s \in \mathcal{S}$ in the sample                                                             |
| $\hat{\pi}_z(s)$           | $n_z(s)/n(s)$ , estimated treatment assignment probability for treatment group $z \in \{0, 1\}$ in stratum $s \in \mathcal{S}$ |
| $F_{Y(d)}(y)$              | $\mathbb{E}[\mathbb{1}_{\{Y(d) \leq y\}}]$ , potential outcome distribution function                                           |
| $\mu_z(y, s, x)$           | $\mathbb{E}[\mathbb{1}_{\{Y \leq y\}} \mid Z = z, S = s, X = x]$ , conditional distribution function                           |
| $\eta_z(s, x)$             | $\mathbb{E}[D \mid Z = z, S = s, X = x]$ , conditional probability of treatment receipt                                        |
| $[K]$                      | $\{1, \dots, K\}$ for a positive integer $K$                                                                                   |
| $\ a\ $                    | $\sqrt{a^\top a}$ , Euclidean norm of a vector $a = (a_1, \dots, a_p)^\top \in \mathbb{R}^p$                                   |
| $\ \cdot\ _{P,q}$          | $L^q(P)$ norm                                                                                                                  |
| $\ell^\infty(\mathcal{Y})$ | space of uniformly bounded functions mapping an arbitrary index set $\mathcal{Y}$ to the real line                             |
| $\rightsquigarrow$         | convergence in distribution or law                                                                                             |
| $X_n = O_p(a_n)$           | $\lim_{K \rightarrow \infty} \lim_{n \rightarrow \infty} P( X_n  > K a_n) = 0$ for a sequence $a_n > 0$                        |
| $X_n = o_p(a_n)$           | $\sup_{K > 0} \lim_{n \rightarrow \infty} P( X_n  > K a_n) = 0$ for a sequence $a_n > 0$                                       |
| $x_n \lesssim y_n$         | for sequences $x_n$ and $y_n$ in $\mathbb{R}$ , $x_n \leq A y_n$ for a constant $A$                                            |
| $\lfloor b \rfloor$        | $\max\{k \in \mathbb{Z} \mid k \leq b\}$ , greatest integer less than or equal to $b$                                          |

## B Definitions

**Definition B.1** (Covering numbers). The *covering number*  $N(\mathcal{F}, \epsilon, \|\cdot\|)$  is the minimal number of balls  $\{g : \|g - f\| < \epsilon\}$  of radius  $\epsilon$  needed to cover the set  $\mathcal{F}$ . The centers of the balls need not belong to  $\mathcal{F}$ , but they should have finite norms.

**Definition B.2** (Envelope function). An *envelope function* of a class  $\mathcal{F}$  is any function  $x \mapsto F(x)$  such that  $|f(x)| \leq F(x)$  for every  $x$  and  $f \in \mathcal{F}$ .

**Definition B.3** (VC-type class). We say  $\mathcal{F}$  is of VC-type with coefficients  $(\alpha_n, v_n)$  if

$$\sup_Q N(\mathcal{F}, e_Q, \epsilon \|F\|_{Q,2}) \leq \left(\frac{\alpha_n}{\epsilon}\right)^{v_n}, \quad \forall \epsilon \in (0, 1],$$

where  $N(\cdot)$  denote the covering number,  $e_Q(f, g) = \|f - g\|_{Q,2}$ , and the supremum is taken over all finitely discrete probability measures  $Q$ .

## 17 C Proofs

### 18 C.1 Proof of Lemma 3.2

19 To prove Lemma 3.2, we introduce additional notation to categorize individuals based on their  
 20 compliance type. Table 2 summarizes the four compliance types with respect to the potential  
 21 treatment choices. We let  $\mathcal{C}$  denote the compliance type, and  $\mathcal{C} = c$  denote the compliers, i.e., those  
 with  $D(1) > D(0)$ .

Table 2: Compliance types

| $D(1)$ | $D(0)$ | type          |
|--------|--------|---------------|
| 0      | 0      | never-takers  |
| 0      | 1      | defiers       |
| 1      | 0      | compliers     |
| 1      | 1      | always-takers |

22

23 *Proof.* Under the monotonicity assumption stated in Assumption 3.1(iv), we can identify the cumula-  
 24 tive distribution functions of potential outcomes for the compliers conditional on  $S$  as follows:

$$F_{Y(1)}(y | S, \mathcal{C} = c) = \frac{\mathbb{E}[\mathbb{1}_{\{Y \leq y\}} \cdot D | Z = 1, S] - \mathbb{E}[\mathbb{1}_{\{Y \leq y\}} \cdot D | Z = 0, S]}{\mathbb{E}[D | Z = 1, S] - \mathbb{E}[D | Z = 0, S]}, \quad (1)$$

$$F_{Y(0)}(y | S, \mathcal{C} = c) = \frac{\mathbb{E}[\mathbb{1}_{\{Y \leq y\}} \cdot (1 - D) | Z = 1, S] - \mathbb{E}[\mathbb{1}_{\{Y \leq y\}} \cdot (1 - D) | Z = 0, S]}{\mathbb{E}[1 - D | Z = 1, S] - \mathbb{E}[1 - D | Z = 0, S]}. \quad (2)$$

25 We can then derive the unconditional CDF of the potential outcomes for the compliers by aggregating  
 26 over the strata:

$$\begin{aligned} F_{Y(1)}(y | \mathcal{C} = c) &= \sum_{s=1}^S P(S = s | \mathcal{C} = c) F_{Y(1)}(y | S = s, \mathcal{C} = c) \\ &= \sum_{s=1}^S \frac{P(\mathcal{C} = c | S = s)}{P(\mathcal{C} = c)} F_{Y(1)}(y | S = s, \mathcal{C} = c) \\ &= \frac{\sum_{s=1}^S p(s) (\mathbb{E}[\mathbb{1}_{\{Y \leq y\}} \cdot D | Z = 1, S = s] - \mathbb{E}[\mathbb{1}_{\{Y \leq y\}} \cdot D | Z = 0, S = s])}{\sum_{s=1}^S p(s) (\mathbb{E}[D | Z = 1, S = s] - \mathbb{E}[D | Z = 0, S = s])}. \end{aligned}$$

27 The first equality holds by the law of total expectation. The second equality holds by the Bayes' law.  
 28 The third equality follows from representation of the conditional distribution given in (1) and the  
 29 fact that  $P(\mathcal{C} = c | S = s) = \mathbb{E}[D | Z = 1, S = s] - \mathbb{E}[D | Z = 0, S = s]$ . We can obtain similar  
 30 expressions for  $F_{Y(0)}(y | \mathcal{C} = c)$  using the representation given in (2) as follows:

$$F_{Y(0)}(y | \mathcal{C} = c) = \frac{\sum_{s=1}^S p(s) (\mathbb{E}[\mathbb{1}_{\{Y \leq y\}} \cdot (1 - D) | Z = 1, S = s] - \mathbb{E}[\mathbb{1}_{\{Y \leq y\}} \cdot (1 - D) | Z = 0, S = s])}{\sum_{s=1}^S p(s) (\mathbb{E}[1 - D | Z = 1, S = s] - \mathbb{E}[1 - D | Z = 0, S = s])}.$$

31 Then, the LDTE, the difference between the distribution functions is given by

$$\begin{aligned} \beta(y) &:= F_{Y(1)}(y | \mathcal{C} = c) - F_{Y(0)}(y | \mathcal{C} = c) \\ &= \frac{\sum_{s=1}^S p(s) (\mathbb{E}[\mathbb{1}_{\{Y \leq y\}} \cdot D | Z = 1, S = s] - \mathbb{E}[\mathbb{1}_{\{Y \leq y\}} \cdot D | Z = 0, S = s])}{\sum_{s=1}^S p(s) (\mathbb{E}[D | Z = 1, S = s] - \mathbb{E}[D | Z = 0, S = s])} \\ &\quad + \frac{\sum_{s=1}^S p(s) (\mathbb{E}[\mathbb{1}_{\{Y \leq y\}} \cdot (1 - D) | Z = 1, S = s] - \mathbb{E}[\mathbb{1}_{\{Y \leq y\}} \cdot (1 - D) | Z = 0, S = s])}{\sum_{s=1}^S p(s) (\mathbb{E}[D | Z = 1, S = s] - \mathbb{E}[D | Z = 0, S = s])} \\ &= \frac{\sum_{s=1}^S p(s) (\mathbb{E}[\mathbb{1}_{\{Y \leq y\}} | Z = 1, S = s] - \mathbb{E}[\mathbb{1}_{\{Y \leq y\}} | Z = 0, S = s])}{\sum_{s=1}^S p(s) (\mathbb{E}[D | Z = 1, S = s] - \mathbb{E}[D | Z = 0, S = s])}. \end{aligned}$$

32 This completes the proof.  $\square$

## 33 C.2 Proof of Theorem 5.2

34 To prove Theorem 5.2, we first introduce some additional notations. Let  $\mathcal{D}_i :=$   
 35  $\{Y_i(1), Y_i(0), D_i(1), D_i(0), X_i\}$ ,  $Y_i^1(y) := \mathbb{1}_{\{Y_i(D_i(1)) \leq y\}}$ ,  $Y_i^0(y) := \mathbb{1}_{\{Y_i(D_i(0)) \leq y\}}$ ,  $\tilde{Y}_i^1(y) :=$   
 36  $Y_i^1(y) - \mathbb{E}[Y_i^1(y)|S_i]$ ,  $\tilde{Y}_i^0(y) := Y_i^0(y) - \mathbb{E}[Y_i^0(y)|S_i]$ ,  $\tilde{X}_i := X_i - \mathbb{E}[X_i|S_i]$ ,  $\tilde{D}_i(z) :=$   
 37  $D_i(z) - \mathbb{E}[D_i(z)|S_i]$ ,  $\tilde{\mu}_z(y, S_i, X_i) := \mu_z(y, S_i, X_i) - \mathbb{E}[\mu_z(y, S_i, X_i)|S_i]$  and  $\tilde{\eta}_z(S_i, X_i) :=$   
 38  $\eta_z(S_i, X_i) - \mathbb{E}[\eta_z(S_i, X_i)|S_i]$  for  $z \in \{0, 1\}$ .

39 *Proof.* Let

$$\begin{aligned} B &:= \mathbb{E}[D(1) - D(0)], \\ T(y) &:= \mathbb{E}[(\mathbb{1}_{\{Y(1) \leq y\}} - \mathbb{1}_{\{Y(0) \leq y\}})(D(1) - D(0))], \\ \hat{B} &:= \frac{1}{n} \sum_{i=1}^n \left[ \frac{Z_i \cdot (D_i - \hat{\eta}_1(S_i, X_i))}{\hat{\pi}(S_i)} - \frac{(1 - Z_i) \cdot (D_i - \hat{\eta}_0(S_i, X_i))}{1 - \hat{\pi}(S_i)} + \hat{\eta}_1(S_i, X_i) - \hat{\eta}_0(S_i, X_i) \right], \\ \hat{T}(y) &:= \frac{1}{n} \sum_{i=1}^n \left[ \frac{Z_i \cdot (\mathbb{1}_{\{Y_i \leq y\}} - \hat{\mu}_1(y, S_i, X_i))}{\hat{\pi}(S_i)} - \frac{(1 - Z_i) \cdot (\mathbb{1}_{\{Y_i \leq y\}} - \hat{\mu}_0(y, S_i, X_i))}{1 - \hat{\pi}(S_i)} \right. \\ &\quad \left. + \hat{\mu}_1(y, S_i, X_i) - \hat{\mu}_0(y, S_i, X_i) \right]. \end{aligned}$$

40 Then, we have

$$\begin{aligned} \sqrt{n}(\hat{\beta}(y) - \beta(y)) &= \sqrt{n} \left( \frac{\hat{T}(y)}{\hat{B}} - \frac{T(y)}{B} \right) \\ &= \frac{1}{\hat{B}} \sqrt{n}(\hat{T}(y) - T(y)) - \frac{T(y)}{\hat{B}B} \sqrt{n}(\hat{B} - B) \\ &= \frac{1}{\hat{B}} \left[ \sqrt{n}(\hat{T}(y) - T(y)) - \beta(y) \sqrt{n}(\hat{B} - B) \right]. \end{aligned} \quad (3)$$

41 **Step 1.** First, we start with the linear expansion of  $\sqrt{n}(\hat{T}(y) - T(y))$ .

$$\begin{aligned} \sqrt{n}(\hat{T}(y) - T(y)) &= \frac{1}{\sqrt{n}} \sum_{i=1}^n \left[ \frac{Z_i \cdot (\mathbb{1}_{\{Y_i \leq y\}} - \hat{\mu}_1(y, S_i, X_i))}{\hat{\pi}(S_i)} - \frac{(1 - Z_i) \cdot (\mathbb{1}_{\{Y_i \leq y\}} - \hat{\mu}_0(y, S_i, X_i))}{1 - \hat{\pi}(S_i)} \right. \\ &\quad \left. + \hat{\mu}_1(y, S_i, X_i) - \hat{\mu}_0(y, S_i, X_i) \right] - \sqrt{n}T(y) \\ &= \frac{1}{\sqrt{n}} \sum_{i=1}^n \underbrace{\left[ \hat{\mu}_1(y, S_i, X_i) - \frac{Z_i \hat{\mu}_1(y, S_i, X_i)}{\hat{\pi}(S_i)} \right]}_{\equiv T_{n,1}} \\ &\quad + \frac{1}{\sqrt{n}} \sum_{i=1}^n \underbrace{\left[ \frac{(1 - Z_i) \hat{\mu}_0(y, S_i, X_i)}{1 - \hat{\pi}(S_i)} - \hat{\mu}_0(y, S_i, X_i) \right]}_{\equiv T_{n,2}} \\ &\quad + \frac{1}{\sqrt{n}} \sum_{i=1}^n \underbrace{\frac{Z_i \cdot \mathbb{1}_{\{Y_i \leq y\}}}{\hat{\pi}(S_i)} - \frac{1}{\sqrt{n}} \sum_{i=1}^n \frac{(1 - Z_i) \cdot \mathbb{1}_{\{Y_i \leq y\}}}{1 - \hat{\pi}(S_i)}}_{\equiv T_{n,3}} - \sqrt{n}T(y). \end{aligned} \quad (4)$$

42 We first show that

$$\begin{aligned}
\sqrt{n}(\widehat{T}(y) - T(y)) &= \left\{ \frac{1}{\sqrt{n}} \sum_{i=1}^n \left[ \left( 1 - \frac{1}{\pi(S_i)} \right) \tilde{\mu}_1(y, S_i, X_i) - \tilde{\mu}_0(y, S_i, X_i) + \frac{\tilde{Y}_i^1(y)}{\pi(S_i)} \right] Z_i \right. \\
&\quad \left. + \frac{1}{\sqrt{n}} \sum_{i=1}^n \left[ \left( \frac{1}{1 - \pi(S_i)} - 1 \right) \tilde{\mu}_0(y, S_i, X_i) + \tilde{\mu}_1(y, S_i, X_i) - \frac{\tilde{Y}_i^0}{1 - \pi(S_i)} \right] (1 - Z_i) \right\} \\
&\quad + \left\{ \frac{1}{\sqrt{n}} \sum_{i=1}^n \left( \mathbb{E}[Y_i^1(y) - Y_i^0(y) | S_i] - \mathbb{E}[Y_i^1(y) - Y_i^0(y)] \right) \right\} + R(y), \quad (5)
\end{aligned}$$

43 where  $\sup_{y \in \mathcal{Y}} |R(y)| = o_p(1)$ .

44 We start with the first term  $T_{n,1}$  in (4).

$$\begin{aligned}
T_{n,1} &= \frac{1}{\sqrt{n}} \sum_{i=1}^n \left[ \widehat{\mu}_1(y, S_i, X_i) - \frac{Z_i \widehat{\mu}_1(y, S_i, X_i)}{\widehat{\pi}(S_i)} \right] \\
&= -\frac{1}{\sqrt{n}} \sum_{i=1}^n \frac{Z_i - \widehat{\pi}(S_i)}{\widehat{\pi}(S_i)} \widehat{\mu}_1(y, S_i, X_i) \\
&= -\frac{1}{\sqrt{n}} \sum_{i=1}^n \frac{Z_i - \widehat{\pi}(S_i)}{\widehat{\pi}(S_i)} \left[ \widehat{\mu}_1(y, S_i, X_i) - \mu_1(y, S_i, X_i) + \mu_1(y, S_i, X_i) \right] \\
&= -\frac{1}{\sqrt{n}} \sum_{i=1}^n \frac{Z_i - \widehat{\pi}(S_i)}{\widehat{\pi}(S_i)} \delta_y(1, S_i, X_i) - \frac{1}{\sqrt{n}} \sum_{i=1}^n \frac{Z_i}{\widehat{\pi}(S_i)} \mu_1(y, S_i, X_i) + \frac{1}{\sqrt{n}} \sum_{i=1}^n \mu_1(y, S_i, X_i) \\
&= -\frac{1}{\sqrt{n}} \sum_{i=1}^n \frac{Z_i - \widehat{\pi}(S_i)}{\widehat{\pi}(S_i)} \delta_y(1, S_i, X_i) - \frac{1}{\sqrt{n}} \sum_{i=1}^n \frac{Z_i}{\widehat{\pi}(S_i)} \tilde{\mu}_1(y, S_i, X_i) + \frac{1}{\sqrt{n}} \sum_{i=1}^n \tilde{\mu}_1(y, S_i, X_i) \\
&= \frac{1}{\sqrt{n}} \sum_{i=1}^n \left( 1 - \frac{1}{\pi(S_i)} \right) Z_i \tilde{\mu}_1(y, S_i, X_i) + \frac{1}{\sqrt{n}} \sum_{i=1}^n (1 - Z_i) \tilde{\mu}_1(y, S_i, X_i) \\
&\quad + \underbrace{\frac{1}{\sqrt{n}} \sum_{s \in \mathcal{S}} \left( \frac{\widehat{\pi}(s) - \pi(s)}{\widehat{\pi}(s) \pi(s)} \right) \sum_{i=1}^n Z_i \tilde{\mu}_1(y, S_i, X_i) 1\{S_i = s\}}_{\equiv R_{1,1}(y)} - \underbrace{\frac{1}{\sqrt{n}} \sum_{i=1}^n \frac{Z_i - \widehat{\pi}(S_i)}{\widehat{\pi}(S_i)} \delta_y(1, S_i, X_i)}_{\equiv R_{1,2}(y)},
\end{aligned}$$

45 where the second last equality holds because we have

$$\frac{1}{\sqrt{n}} \sum_{i=1}^n \frac{Z_i}{\widehat{\pi}(S_i)} \mathbb{E}[\mu_1(y, S_i, X_i) | S_i] = \frac{1}{\sqrt{n}} \sum_{i=1}^n \mathbb{E}[\mu_1(y, S_i, X_i) | S_i].$$

46 Now, consider the term  $R_{1,2}(y)$ :

$$\begin{aligned}
& \left| \frac{1}{\sqrt{n}} \sum_{i=1}^n \frac{Z_i - \hat{\pi}(S_i)}{\hat{\pi}(S_i)} \delta_y(1, S_i, X_i) \right| = \left| \frac{1}{\sqrt{n}} \sum_{s \in \mathcal{S}} \sum_{i=1}^n \frac{Z_i - \hat{\pi}(s)}{\hat{\pi}(s)} \delta_y(1, s, X_i) 1\{S_i = s\} \right| \\
&= \frac{1}{\sqrt{n}} \left| \sum_{s \in \mathcal{S}} \frac{1}{\hat{\pi}(s)} \sum_{i=1}^n Z_i \delta_y(1, s, X_i) 1\{S_i = s\} - \sum_{s \in \mathcal{S}} \sum_{i=1}^n \delta_y(1, s, X_i) 1\{S_i = s\} \right| \\
&= \frac{1}{\sqrt{n}} \left| \sum_{s \in \mathcal{S}} \sum_{i \in I_1(s)} \delta_y(1, s, X_i) \frac{n(s)}{n_1(s)} - \sum_{s \in \mathcal{S}} \sum_{i \in I_0(s) \cup I_1(s)} \delta_y(1, s, X_i) \right| \\
&= \frac{1}{\sqrt{n}} \left| \sum_{s \in \mathcal{S}} \sum_{i \in I_1(s)} \delta_y(1, s, X_i) \frac{n_0(s)}{n_1(s)} - \sum_{s \in \mathcal{S}} \sum_{i \in I_0(s)} \delta_y(1, s, X_i) \right| \\
&= \frac{1}{\sqrt{n}} \left| \sum_{s \in \mathcal{S}} n_0(s) \left[ \frac{\sum_{i \in I_1(s)} \delta_y(1, s, X_i)}{n_1(s)} - \frac{\sum_{i \in I_0(s)} \delta_y(1, s, X_i)}{n_0(s)} \right] \right| \\
&\leq \frac{1}{\sqrt{n}} \sum_{s \in \mathcal{S}} n_0(s) \sup_{y \in \mathcal{Y}} \left| \frac{\sum_{i \in I_1(s)} \delta_y(1, s, X_i)}{n_1(s)} - \frac{\sum_{i \in I_0(s)} \delta_y(1, s, X_i)}{n_0(s)} \right| = o_p(1)
\end{aligned}$$

47 where the last equality is due to Assumption 5.1 (i). Thus, we have

$$\begin{aligned}
T_{n,1} &= -\frac{1}{\sqrt{n}} \sum_{i=1}^n \frac{Z_i}{\hat{\pi}(S_i)} \tilde{\mu}_1(y, S_i, X_i) + \frac{1}{\sqrt{n}} \sum_{i=1}^n \tilde{\mu}_1(y, S_i, X_i) + R_1(y) \\
&= -\frac{1}{\sqrt{n}} \sum_{i=1}^n \frac{Z_i}{\hat{\pi}(S_i)} \tilde{\mu}_1(y, S_i, X_i) + \frac{1}{\sqrt{n}} \sum_{i=1}^n Z_i \tilde{\mu}_1(y, S_i, X_i) + \frac{1}{\sqrt{n}} \sum_{i=1}^n (1 - Z_i) \tilde{\mu}_1(y, S_i, X_i) + R_1(y) \\
&= \frac{1}{\sqrt{n}} \sum_{i=1}^n \left\{ 1 - \frac{1}{\hat{\pi}(S_i)} \right\} Z_i \tilde{\mu}_1(y, S_i, X_i) + \frac{1}{\sqrt{n}} \sum_{i=1}^n (1 - Z_i) \tilde{\mu}_1(y, S_i, X_i) + R_1(y), \quad (6)
\end{aligned}$$

48 where  $\sup_{y \in \mathcal{Y}} R_1(y) = o_p(1)$ . Moreover, we note that

$$\begin{aligned}
\frac{1}{\sqrt{n}} \sum_{i=1}^n \left( 1 - \frac{1}{\hat{\pi}(S_i)} \right) Z_i \tilde{\mu}_1(y, S_i, X_i) &= \frac{1}{\sqrt{n}} \sum_{i=1}^n \left( 1 - \frac{1}{\pi(S_i)} \right) Z_i \tilde{\mu}_1(y, S_i, X_i) \\
&\quad + \sum_{s \in \mathcal{S}} \left( \frac{1}{\pi(s)} - \frac{1}{\hat{\pi}(s)} \right) \frac{1}{\sqrt{n}} \sum_{i=1}^n Z_i \tilde{\mu}_1(y, s, X_i) 1\{S_i = s\}.
\end{aligned}$$

Note that under Assumption 3.1(i), conditional on  $\{Z_i, S_i\}_{i=1}^n$ , the distribution of

$$\frac{1}{\sqrt{n}} \sum_{i=1}^n Z_i \tilde{\mu}_1(y, s, X_i) 1\{S_i = s\}$$

49 is the same as the distribution of the same quantity where units are ordered by strata and then ordered  
50 by  $Z_i = 1$  first and  $Z_i = 0$  second within strata. To this end, define  $N(s) := \sum_{i=1}^n 1\{S_i < s\}$  and  
51  $F(s) := \mathbb{P}(S_i < s)$ . Furthermore, independently for each  $s \in \mathcal{S}$  and independently of  $\{Z_i, S_i\}_{i=1}^n$ ,  
52 let  $\{X_i^s : 1 \leq i \leq n\}$  be i.i.d with marginal distribution equal to the distribution of  $X_i | S_i = s$ . Define

$$\tilde{\mu}_z(y, s, X_i^s) := \mu_z(y, s, X_i^s) - \mathbb{E}[\mu_z(y, s, X_i^s) | S_i = s].$$

53 Then, we have, for  $s \in \mathcal{S}$ ,

$$\frac{1}{\sqrt{n}} \sum_{i=1}^n Z_i \tilde{\mu}_1(y, s, X_i) 1\{S_i = s\} \stackrel{d}{=} \frac{1}{\sqrt{n}} \sum_{i=N(s)+1}^{N(s)+n_1(s)} \tilde{\mu}_1(y, s, X_i^s).$$

54 We also have

$$\begin{aligned} \mathbb{E} \left[ \left( \frac{1}{\sqrt{n}} \sum_{i=N(s)+1}^{N(s)+n_1(s)} \tilde{\mu}_1(y, s, X_i^s) \right)^2 \middle| \{Z_i, S_i\}_{i=1}^n \right] &= \frac{n_1(s)}{n} \mathbb{E} [\tilde{\mu}_1^2(y, s, X_i^s) | \{S_i\}_{i=1}^n] \\ &\leq \frac{n_1(s)}{n} E [\mu_1^2(y, s, X_i) | S_i = s] = O_p(1). \end{aligned}$$

55 Hence, we have

$$\max_{s \in \mathcal{S}} \left| \frac{1}{\sqrt{n}} \sum_{i=N(s)+1}^{N(s)+n_1(s)} \tilde{\mu}_1(y, s, X_i^s) \right| = O_p(1).$$

56 Combining this with the facts that  $\max_{s \in \mathcal{S}} |\hat{\pi}(s) - \pi(s)| = o_p(1)$  and  $\min_{s \in \mathcal{S}} \pi(s) > c > 0$  for  
57 some constant  $c$ , we have

$$\sum_{s \in \mathcal{S}} \left( \frac{1}{\pi(s)} - \frac{1}{\hat{\pi}(s)} \right) \frac{1}{\sqrt{n}} \sum_{i=1}^n Z_i \tilde{\mu}_1(y, s, X_i) 1\{S_i = s\} = o_p(1).$$

58 Therefore, we have

$$T_{n,1} = \frac{1}{\sqrt{n}} \sum_{i=1}^n \left( 1 - \frac{1}{\pi(S_i)} \right) Z_i \tilde{\mu}_1(y, S_i, X_i) + \frac{1}{\sqrt{n}} \sum_{i=1}^n (1 - Z_i) \tilde{\mu}_1(y, S_i, X_i) + o_p(1).$$

59 The linear expansion of  $T_{n,2}$  can be established in the same manner. As for the third term  $T_{n,3}$ , first  
60 note that

$$\begin{aligned} \frac{1}{\sqrt{n}} \sum_{i=1}^n \frac{Z_i \cdot \mathbb{1}_{\{Y_i \leq y\}}}{\hat{\pi}(S_i)} &= \frac{1}{\sqrt{n}} \sum_{i=1}^n \frac{Z_i \cdot \mathbb{1}_{\{Y_i(D_i(1)) \leq y\}}}{\hat{\pi}(S_i)} =: \frac{1}{\sqrt{n}} \sum_{i=1}^n \frac{Z_i \cdot Y_i^1(y)}{\hat{\pi}(S_i)} \\ \frac{1}{\sqrt{n}} \sum_{i=1}^n \frac{(1 - Z_i) \mathbb{1}_{\{Y_i \leq y\}}}{1 - \hat{\pi}(S_i)} &= \frac{1}{\sqrt{n}} \sum_{i=1}^n \frac{(1 - Z_i) \mathbb{1}_{\{Y_i(D_i(0)) \leq y\}}}{1 - \hat{\pi}(S_i)} =: \frac{1}{\sqrt{n}} \sum_{i=1}^n \frac{(1 - Z_i) Y_i^0(y)}{1 - \hat{\pi}(S_i)}. \end{aligned}$$

61 Then we have

$$\begin{aligned} T_{n,3} &= \frac{1}{\sqrt{n}} \sum_{i=1}^n \frac{Z_i \cdot \mathbb{1}_{\{Y_i \leq y\}}}{\hat{\pi}(S_i)} - \frac{1}{\sqrt{n}} \sum_{i=1}^n \frac{(1 - Z_i) \cdot \mathbb{1}_{\{Y_i \leq y\}}}{1 - \hat{\pi}(S_i)} - \sqrt{n} T(y) \\ &= \left\{ \frac{1}{\sqrt{n}} \sum_{i=1}^n \frac{1}{\hat{\pi}(S_i)} \tilde{Y}_i^1(y) Z_i - \frac{1}{\sqrt{n}} \sum_{i=1}^n \frac{1 - Z_i}{1 - \hat{\pi}(S_i)} \tilde{Y}_i^0(y) \right\} \\ &\quad + \left\{ \frac{1}{\sqrt{n}} \sum_{i=1}^n \frac{1}{\hat{\pi}(S_i)} \mathbb{E}[Y_i^1(y) | S_i] Z_i - \frac{1}{\sqrt{n}} \sum_{i=1}^n \frac{1 - Z_i}{1 - \hat{\pi}(S_i)} \mathbb{E}[Y_i^0(y) | S_i] - \sqrt{n} T(y) \right\}. \quad (7) \end{aligned}$$

62 First note that

$$\frac{1}{\sqrt{n}} \sum_{i=1}^n \frac{1}{\hat{\pi}(S_i)} \mathbb{E}[Y_i^1(y) | S_i] Z_i = \frac{1}{\sqrt{n}} \sum_{i=1}^n \frac{1}{\pi(S_i)} \mathbb{E}[Y_i^1(y) | S_i] Z_i - \frac{1}{\sqrt{n}} \sum_{i=1}^n \frac{\hat{\pi}(S_i) - \pi(S_i)}{\hat{\pi}(S_i) \pi(S_i)} \mathbb{E}[Y_i^1(y) | S_i] Z_i,$$

$$\begin{aligned}
\frac{1}{\sqrt{n}} \sum_{i=1}^n \frac{1}{\pi(S_i)} \mathbb{E}[Y_i^1(y)|S_i] Z_i &= \sum_{s \in \mathcal{S}} \frac{1}{\sqrt{n}} \sum_{i=1}^n \frac{1}{\pi(s)} \mathbb{E}[Y_i^1(y)|S_i = s] Z_i 1\{S_i = s\} \\
&= \sum_{s \in \mathcal{S}} \frac{1}{\sqrt{n}} \sum_{i=1}^n \frac{\mathbb{E}[Y_i^1(y)|S_i = s]}{\pi(s)} (Z_i - \pi(s)) 1\{S_i = s\} \\
&\quad + \sum_{s \in \mathcal{S}} \frac{1}{\sqrt{n}} \sum_{i=1}^n \frac{1}{\pi(s)} \mathbb{E}[Y_i^1(y)|S_i = s] \pi(s) 1\{S_i = s\} \\
&= \sum_{s \in \mathcal{S}} \frac{\mathbb{E}[Y^1(y)|S = s]}{\pi(s)\sqrt{n}} \sum_{i=1}^n (Z_i - \pi(s)) 1\{S_i = s\} \\
&\quad + \sum_{s \in \mathcal{S}} \frac{\mathbb{E}[Y^1(y)|S = s]}{\sqrt{n}} \sum_{i=1}^n 1\{S_i = s\} \\
&= \sum_{s \in \mathcal{S}} \frac{\mathbb{E}[Y^1(y)|S = s]}{\pi(s)\sqrt{n}} B_n(s) + \sum_{s \in \mathcal{S}} \frac{\mathbb{E}[Y^1(y)|S = s]}{\sqrt{n}} n(s),
\end{aligned}$$

64 and

$$\begin{aligned}
\frac{1}{\sqrt{n}} \sum_{i=1}^n \frac{\hat{\pi}(S_i) - \pi(S_i)}{\hat{\pi}(S_i)\pi(S_i)} \mathbb{E}[Y_i^1(y)|S_i] Z_i &= \sum_{s \in \mathcal{S}} \frac{1}{\sqrt{n}} \sum_{i=1}^n \frac{\hat{\pi}(s) - \pi(s)}{\hat{\pi}(s)\pi(s)} \mathbb{E}[Y_i^1(y)|S_i = s] Z_i 1\{S_i = s\} \\
&= \sum_{s \in \mathcal{S}} \frac{1}{\sqrt{n}} \sum_{i=1}^n \frac{B_n(s)}{n(s)\hat{\pi}(s)\pi(s)} \mathbb{E}[Y_i^1(y)|S_i = s] Z_i 1\{S_i = s\} \\
&= \sum_{s \in \mathcal{S}} \frac{B_n(s)\mathbb{E}[Y^1(y)|S = s]}{\sqrt{n}n(s)\hat{\pi}(s)\pi(s)} \sum_{i=1}^n Z_i 1\{S_i = s\} \\
&= \sum_{s \in \mathcal{S}} \frac{B_n(s)\mathbb{E}[Y^1(y)|S = s]}{\sqrt{n}n(s)\hat{\pi}(s)\pi(s)} n_1(s) \\
&= \sum_{s \in \mathcal{S}} \frac{B_n(s)\mathbb{E}[Y^1(y)|S = s]}{\sqrt{n}\pi(s)}.
\end{aligned}$$

65 Therefore, we have

$$\frac{1}{\sqrt{n}} \sum_{i=1}^n \frac{1}{\hat{\pi}(S_i)} \mathbb{E}[Y_i^1(y)|S_i] Z_i = \sum_{s \in \mathcal{S}} \frac{\mathbb{E}[Y^1(y)|S = s]}{\sqrt{n}} n(s).$$

66 Similarly, we have

$$\frac{1}{\sqrt{n}} \sum_{i=1}^n \frac{1 - Z_i}{1 - \hat{\pi}(S_i)} \mathbb{E}[Y_i^0(y)|S_i] = \sum_{s \in \mathcal{S}} \frac{\mathbb{E}[Y^0(y)|S = s]}{\sqrt{n}} n(s)$$

67 Then, we have

$$\begin{aligned}
& \frac{1}{\sqrt{n}} \sum_{i=1}^n \frac{1}{\hat{\pi}(S_i)} \mathbb{E}[Y_i^1(y)|S_i] Z_i - \frac{1}{\sqrt{n}} \sum_{i=1}^n \frac{1 - Z_i}{1 - \hat{\pi}(S_i)} \mathbb{E}[Y_i^0(y)|S_i] - \sqrt{n} T(y) \\
&= \sum_{s \in \mathcal{S}} \frac{\mathbb{E}[Y^1(y)|S = s]}{\sqrt{n}} n(s) - \sum_{s \in \mathcal{S}} \frac{\mathbb{E}[Y^0(y)|S = s]}{\sqrt{n}} n(s) - \sqrt{n} T(y) \\
&= \sum_{s \in \mathcal{S}} \sqrt{n} \left( \frac{n(s)}{n} - p(s) \right) \mathbb{E}[Y^1(y) - Y^0(y)|S = s] + \sum_{s \in \mathcal{S}} \sqrt{n} p(s) \mathbb{E}[Y^1(y) - Y^0(y)|S = s] - \sqrt{n} T(y) \\
&= \sum_{s \in \mathcal{S}} \sqrt{n} \left( \frac{n(s)}{n} - p(s) \right) \mathbb{E}[Y^1(y) - Y^0(y)|S = s] + \sqrt{n} \mathbb{E}[Y^1(y) - Y^0(y)] - \sqrt{n} T(y) \\
&= \sum_{s \in \mathcal{S}} \frac{n(s)}{\sqrt{n}} \mathbb{E}[Y^1(y) - Y^0(y)|S = s] - \sqrt{n} \mathbb{E}[Y^1(y) - Y^0(y)] \\
&= \frac{1}{\sqrt{n}} \sum_{s \in \mathcal{S}} \sum_{i=1}^n (1\{S_i = s\} \mathbb{E}[Y_i^1(y) - Y_i^0(y)|S_i = s]) - \sqrt{n} \mathbb{E}[Y^1(y) - Y^0(y)] \\
&= \frac{1}{\sqrt{n}} \sum_{i=1}^n \mathbb{E}[Y_i^1(y) - Y_i^0(y)|S_i] - \sqrt{n} \mathbb{E}[Y^1(y) - Y^0(y)] \\
&= \frac{1}{\sqrt{n}} \sum_{i=1}^n (\mathbb{E}[Y_i^1(y) - Y_i^0(y)|S_i] - \mathbb{E}[Y_i^1(y) - Y_i^0(y)]) . \tag{8}
\end{aligned}$$

68 Combining, we have

$$\begin{aligned}
T_{n,3} &= \left\{ \frac{1}{\sqrt{n}} \sum_{i=1}^n \frac{1}{\hat{\pi}(S_i)} \tilde{Y}_i^1(y) Z_i - \frac{1}{\sqrt{n}} \sum_{i=1}^n \frac{1 - Z_i}{1 - \hat{\pi}(S_i)} \tilde{Y}_i^0(y) \right\} \\
&\quad + \left\{ \frac{1}{\sqrt{n}} \sum_{i=1}^n (\mathbb{E}[Y_i^1(y) - Y_i^0(y)|S_i] - \mathbb{E}[Y_i^1(y) - Y_i^0(y)]) \right\} \\
&= \left\{ \frac{1}{\sqrt{n}} \sum_{i=1}^n \frac{1}{\pi(S_i)} \tilde{Y}_i^1(y) Z_i - \frac{1}{\sqrt{n}} \sum_{i=1}^n \frac{1 - Z_i}{1 - \pi(S_i)} \tilde{Y}_i^0(y) \right\} \\
&\quad + \left\{ \frac{1}{\sqrt{n}} \sum_{i=1}^n (\mathbb{E}[Y_i^1(y) - Y_i^0(y)|S_i] - \mathbb{E}[Y_i^1(y) - Y_i^0(y)]) \right\} + o_p(1),
\end{aligned}$$

69 where the second equality holds because

$$\begin{aligned}
& \left( \frac{1}{\pi(s)} - \frac{1}{\hat{\pi}(s)} \right) \frac{1}{\sqrt{n}} \sum_{i=1}^n \tilde{Y}_i^1(y) Z_i 1\{S_i = s\} = o_p(1) \quad \text{and} \\
& \left( \frac{1}{\pi(s)} - \frac{1}{\hat{\pi}(s)} \right) \frac{1}{\sqrt{n}} \sum_{i=1}^n \tilde{Y}_i^0(y) (1 - Z_i) 1\{S_i = s\} = o_p(1)
\end{aligned}$$

70 due to the same argument used in the proofs of  $T_{n,1}$ .

71 **Step 2.** Using the same arguments, we can show that

$$\begin{aligned}
\sqrt{n}(\hat{B} - B) &= \left\{ \frac{1}{\sqrt{n}} \sum_{i=1}^n \left[ \left( 1 - \frac{1}{\pi(S_i)} \right) \tilde{\eta}_1(S_i, X_i) - \tilde{\eta}_0(S_i, X_i) + \frac{\tilde{D}_i(1)}{\pi(S_i)} \right] Z_i \right. \\
&\quad \left. + \frac{1}{\sqrt{n}} \sum_{i=1}^n \left[ \left( \frac{1}{1 - \pi(S_i)} - 1 \right) \tilde{\eta}_0(S_i, X_i) + \tilde{\eta}_1(S_i, X_i) - \frac{\tilde{D}_i(0)}{1 - \pi(S_i)} \right] (1 - Z_i) \right\} \\
&\quad + \left\{ \frac{1}{\sqrt{n}} \sum_{i=1}^n (\mathbb{E}[D_i(1) - D_i(0)|S_i] - \mathbb{E}[D_i(1) - D_i(0)]) \right\} + o_p(1). \tag{9}
\end{aligned}$$



72 **Step 3.** Combining (5) and (9) into (3), we obtain the linear expansion for  $\hat{\beta}(y)$  as

$$\begin{aligned} & \sqrt{n} \left( \hat{\beta}(y) - \beta(y) \right) \\ &= \frac{1}{\hat{B}} \left[ \sqrt{n} \left( \hat{T}(y) - T(y) \right) - \beta(y) \sqrt{n} \left( \hat{B} - B \right) \right] \\ &= \frac{1}{\hat{B}} \left[ \frac{1}{\sqrt{n}} \sum_{i=1}^n \phi_1(y, S_i, \mathcal{D}_i) Z_i - \frac{1}{\sqrt{n}} \sum_{i=1}^n \phi_0(y, S_i, \mathcal{D}_i) (1 - Z_i) + \frac{1}{\sqrt{n}} \sum_{i=1}^n \phi_s(y, S_i) \right] + I(y) \end{aligned}$$

73 where  $\sup_{y \in \mathcal{Y}} |I(y)| = o_p(1)$  and

$$\begin{aligned} \phi_1(y, S_i, \mathcal{D}_i) &:= \left[ \left( 1 - \frac{1}{\pi(S_i)} \right) \tilde{\mu}_1(y, S_i, X_i) - \tilde{\mu}_0(y, S_i, X_i) + \frac{\tilde{Y}_i^1}{\pi(S_i)} \right] \\ &\quad - \beta(y) \left[ \left( 1 - \frac{1}{\pi(S_i)} \right) \tilde{\eta}_1(S_i, X_i) - \tilde{\eta}_0(S_i, X_i) + \frac{\tilde{D}_i(1)}{\pi(S_i)} \right], \\ \phi_0(y, S_i, \mathcal{D}_i) &:= \left[ \left( 1 - \frac{1}{1 - \pi(S_i)} \right) \tilde{\mu}_0(y, S_i, X_i) - \tilde{\mu}_1(y, S_i, X_i) + \frac{\tilde{Y}_i^0}{1 - \pi(S_i)} \right] \\ &\quad - \beta(y) \left[ \left( 1 - \frac{1}{1 - \pi(S_i)} \right) \tilde{\eta}_0(S_i, X_i) - \tilde{\eta}_1(S_i, X_i) + \frac{\tilde{D}_i(0)}{1 - \pi(S_i)} \right], \\ \phi_s(y, S_i) &:= \left( \mathbb{E}[Y_i^1(y) - Y_i^0(y) | S_i] - \mathbb{E}[Y_i^1(y) - Y_i^0(y)] \right) - \beta(y) \left( \mathbb{E}[D_i(1) - D_i(0) | S_i] - \mathbb{E}[D_i(1) - D_i(0)] \right). \end{aligned}$$

74 **Step 4.** Denote

$$\begin{aligned} \varphi_{n,1}(y) &:= \frac{1}{\sqrt{n}} \sum_{i=1}^n \phi_1(y, S_i, \mathcal{D}_i) Z_i + \frac{1}{\sqrt{n}} \sum_{i=1}^n \phi_0(y, S_i, \mathcal{D}_i) (1 - Z_i), \\ \varphi_{n,2}(y) &:= \frac{1}{\sqrt{n}} \sum_{i=1}^n \phi_s(y, S_i) \end{aligned}$$

75 Uniformly over  $y \in \mathcal{Y}$ , we show that

$$(\varphi_{n,1}(y), \varphi_{n,2}(y)) \rightsquigarrow (\mathcal{G}_1(y), \mathcal{G}_2(y)),$$

76 where  $(\mathcal{G}_1(y), \mathcal{G}_2(y))$  are two independent Gaussian processes with covariance kernels  $\Omega_1(y, y')$  and  
77  $\Omega_2(y, y')$ , respectively, such that

$$\begin{aligned} \Omega_1(y, y') &= \mathbb{E}[\pi(S_i) \phi_1(y, S_i, \mathcal{D}_i) \phi_1(y', S_i, \mathcal{D}_i)] + \mathbb{E}[(1 - \pi(S_i)) \phi_0(y, S_i, \mathcal{D}_i) \phi_0(y', S_i, \mathcal{D}_i)], \\ \Omega_2(y, y') &= \mathbb{E}[\phi_s(y, S_i) \phi_s(y', S_i)]. \end{aligned}$$

78 The following argument follows the argument provided in the proof of Bugni et al. (2018, Lemma  
79 B.2). Note that under Assumption 3.1 (i), conditional on  $\{Z_i, S_i\}_{i=1}^n$ , the distribution of  $\varphi_{n,1}(y)$   
80 is the same as the distribution of the same quantity with units ordered by strata  $s \in \mathcal{S}$  and then  
81 ordered by  $Z_i = 1$  first and  $Z_i = 0$  second within strata. Let  $\{\mathcal{D}_i^s\}_{i=1}^n$  be a sequence of i.i.d. random  
82 variables with marginal distributions equal to the distribution of  $\mathcal{D}_i | S_i = s$ . Then we have

$$\varphi_{n,1}(y) | \{Z_i, S_i\}_{i=1}^n \stackrel{d}{=} \tilde{\varphi}_{n,1}(y) | \{Z_i, S_i\}_{i=1}^n$$

83 where

$$\tilde{\varphi}_{n,1}(y) := \sum_{s \in \mathcal{S}} \frac{1}{\sqrt{n}} \sum_{i=N(s)+1}^{N(s)+n_1(s)} \phi_1(y, s, \mathcal{D}_i^s) + \sum_{s \in \mathcal{S}} \frac{1}{\sqrt{n}} \sum_{i=N(s)+n_1(s)+1}^{N(s)+n(s)} \phi_0(y, s, \mathcal{D}_i^s).$$

84 As  $\varphi_{n,2}(y)$  is a function of  $\{Z_i, S_i\}_{i=1}^n$ , we have

$$(\varphi_{n,1}(y), \varphi_{n,2}(y)) \stackrel{d}{=} (\tilde{\varphi}_{n,1}(y), \varphi_{n,2}(y)).$$

85 Next, define

$$\varphi_{n,1}^*(y) := \sum_{s \in \mathcal{S}} \frac{1}{\sqrt{n}} \sum_{i=\lfloor nF(s) \rfloor + 1}^{\lfloor n(F(s) + \pi(s)p(s)) \rfloor} \phi_1(y, s, \mathcal{D}_i^s) + \sum_{s \in \mathcal{S}} \frac{1}{\sqrt{n}} \sum_{i=\lfloor n(F(s) + \pi(s)p(s)) \rfloor + 1}^{\lfloor n(F(s) + p(s)) \rfloor} \phi_0(y, s, \mathcal{D}_i^s).$$

86 Note  $\varphi_{n,1}^*(y)$  is a function of  $\{\mathcal{D}_i^s\}_{i \in [n], s \in \mathcal{S}}$ , which is independent of  $\{Z_i, S_i\}_{i=1}^n$  by construction.  
87 Therefore,

$$\varphi_{n,1}^*(y) \perp\!\!\!\perp \varphi_{n,2}(y).$$

88 Note that

$$\frac{N(s)}{n} \xrightarrow{p} F(s), \quad \frac{n_1(s)}{n} \xrightarrow{p} \pi(s)p(s), \quad \text{and} \quad \frac{n(s)}{n} \xrightarrow{p} p(s).$$

89 Denote  $\Gamma_{n,z}(s, t, y) := \sum_{i=1}^{\lfloor nt \rfloor} \phi_z(y, s, \mathcal{D}_i^s) / \sqrt{n}$  for  $z \in \{0, 1\}$  and  $s \in \mathcal{S}$ . In order to show that

$$\sup_{y \in \mathcal{Y}} |\tilde{\varphi}_{n,1}(y) - \varphi_{n,1}^*(y)| = o_p(1) \text{ and } \varphi_{n,1}^*(y) \rightsquigarrow \mathcal{G}_1(y),$$

90 it suffices to show that (1) for  $z \in \{0, 1\}$  and  $s \in \mathcal{S}$ , the stochastic process  $\{\Gamma_{n,z}(s, t, y) : t \in$   
91  $(0, 1), y \in \mathcal{Y}\}$  is stochastically equicontinuous, and (2)  $\varphi_{n,1}^*(y) \rightsquigarrow \mathcal{G}_1(y)$  converges to  $\mathcal{G}_1(y)$  in  
92 finite dimension.

93 **Stochastic equicontinuity** We want to bound

$$\sup |\Gamma_{n,z}(s, t_2, y_2) - \Gamma_{n,z}(s, t_1, y_1)|,$$

94 where the supremum is taken over  $0 < t_1 < t_2 < t_1 + \epsilon < 1$  and  $y_1 < y_2 < y_1 + \epsilon$  such that  
95  $y_1, y_1 + \epsilon \in \mathcal{Y}$ . Note that,

$$\begin{aligned} \sup |\Gamma_{n,z}(s, t_2, y_2) - \Gamma_{n,z}(s, t_1, y_1)| &\leq \sup_{0 < t_1 < t_2 < t_1 + \epsilon < 1, y \in \mathcal{Y}} |\Gamma_{n,z}(s, t_2, y) - \Gamma_{n,z}(s, t_1, y)| \\ &\quad + \sup_{t \in (0, 1), y_1, y_2 \in \mathcal{Y}, y_1 < y_2 < y_1 + \epsilon} |\Gamma_{n,z}(s, t, y_2) - \Gamma_{n,z}(s, t, y_1)|. \end{aligned} \tag{10}$$

96 Then, for the first term of the RHS of (10), we have

$$\begin{aligned} &\mathbb{P} \left( \sup_{0 < t_1 < t_2 < t_1 + \epsilon < 1, y \in \mathcal{Y}} |\Gamma_{n,z}(s, t_2, y) - \Gamma_{n,z}(s, t_1, y)| \geq \delta \right) \\ &= \mathbb{P} \left( \sup_{0 < t_1 < t_2 < t_1 + \epsilon < 1, y \in \mathcal{Y}} \left| \sum_{i=\lfloor nt_1 \rfloor + 1}^{\lfloor nt_2 \rfloor} \phi_z(y, s, \mathcal{D}_i^s) \right| \geq \sqrt{n}\delta \right) \\ &= \mathbb{P} \left( \sup_{0 < t \leq \epsilon, y \in \mathcal{Y}} \left| \sum_{i=1}^{\lfloor nt \rfloor} \phi_z(y, s, \mathcal{D}_i^s) \right| \geq \sqrt{n}\delta \right) \\ &\leq \mathbb{P} \left( \max_{1 \leq k \leq \lfloor n\epsilon \rfloor} \sup_{y \in \mathcal{Y}} \left| \sum_{i=1}^k \phi_z(y, s, \mathcal{D}_i^s) \right| \geq \sqrt{n}\delta \right) \\ &\leq \frac{270 \mathbb{E}[\sup_{y \in \mathcal{Y}} |\sum_{i=1}^{\lfloor n\epsilon \rfloor} \phi_z(y, s, \mathcal{D}_i^s)|]}{\sqrt{n}\delta} \\ &\lesssim \frac{\sqrt{n\epsilon}}{\sqrt{n}\delta} \lesssim \delta. \end{aligned}$$

97 The third equality holds due to Assumption 5.1 (ii) and by applying van der Vaart and Wellner (1996,  
98 Theorem 2.14.1). The last equality holds by taking  $\epsilon = \delta^4$ .

99 Similarly, for the second term on the RHS of (10), we have

$$\begin{aligned}
& \mathbb{P} \left( \sup_{t \in (0,1), y_1, y_2 \in \mathcal{Y}, y_1 < y_2 < y_1 + \epsilon} |\Gamma_{n,z}(s, t, y_2) - \Gamma_{n,z}(s, t, y_1)| \geq \delta \right) \\
&= \mathbb{P} \left( \max_{1 \leq k \leq n} \sup_{y_1, y_2 \in \mathcal{Y}, y_1 < y_2 < y_1 + \epsilon} \left| \sum_{i=1}^k (\phi_z(y_2, s, \mathcal{D}_i^s) - \phi_z(y_1, s, \mathcal{D}_i^s)) \right| \geq \sqrt{n}\delta \right) \\
&\leq \frac{270 \mathbb{E}[\sup_{y_1, y_2 \in \mathcal{Y}, y_1 < y_2 < y_1 + \epsilon} |\sum_{i=1}^n (\phi_z(y_2, s, \mathcal{D}_i^s) - \phi_z(y_1, s, \mathcal{D}_i^s))|]}{\sqrt{n}\delta} \\
&\lesssim \delta \sqrt{\log(\frac{C}{\delta^2})},
\end{aligned}$$

100 The last inequality holds due to Assumption 5.1 (ii) and by applying maximal inequality for bracketing  
101 in van der Vaart and Wellner (1996, Theorem 2.14.2). Note that  $\delta \sqrt{\log(\frac{C}{\delta^2})} \rightarrow 0$  as  $\delta \rightarrow 0$ . This  
102 concludes the proof of stochastic equicontinuity.

103 **Finite-dimensional convergence** For a given  $y$ , by the triangular array central limit theorem,

$$\varphi_{n,1}^*(y) \rightsquigarrow N(0, \Omega_1(y, y)),$$

104 where

$$\begin{aligned}
\Omega_1(y, y) &= \lim_{n \rightarrow \infty} \sum_{s \in \mathcal{S}} \frac{(\lfloor n(F(s) + \pi(s)p(s)) \rfloor - \lfloor nF(s) \rfloor)}{n} \mathbb{E}[\phi_1^2(y, s, \mathcal{D}_i^s)] \\
&\quad + \lim_{n \rightarrow \infty} \sum_{s \in \mathcal{S}} \frac{(\lfloor n(F(s) + p(s)) \rfloor - \lfloor n(F(s) + p(s)\pi(s)) \rfloor)}{n} \mathbb{E}[\phi_0^2(y, s, \mathcal{D}_i^s)] \\
&= \sum_{s \in \mathcal{S}} p(s) \mathbb{E}[\pi(s) \phi_1^2(y, S_i, \mathcal{D}_i) + (1 - \pi(s)) \phi_0^2(y, S_i, \mathcal{D}_i) | S_i = s] \\
&= \mathbb{E}[\pi(S_i) \phi_1^2(y, S_i, \mathcal{D}_i)] + \mathbb{E}[(1 - \pi(S_i)) \phi_0^2(y, S_i, \mathcal{D}_i)].
\end{aligned}$$

105 Lastly, finite dimensional convergence follows from the Cramér-Wold device. In particular, the  
106 covariance kernel is given by

$$\Omega_1(y, y') = \mathbb{E}[\pi(S_i) \phi_1(y, S_i, \mathcal{D}_i) \phi_1(y', S_i, \mathcal{D}_i)] + \mathbb{E}[(1 - \pi(S_i)) \phi_0(y, S_i, \mathcal{D}_i) \phi_0(y', S_i, \mathcal{D}_i)].$$

107 This concludes the proof of finite-dimensional convergence of  $\varphi_{n,1}^*(y)$ .

108 Finally, since  $\{\mu_z(y, s, x)(y) : y \in \mathcal{Y}\}$  is of the VC-type with fixed coefficients  $(\alpha, v)$  and a constant  
109 envelope function,  $\{\phi_s(y, S_i) : y \in \mathcal{Y}\}$  is a Donsker class and we have

$$\varphi_{n,2}(y) \rightsquigarrow \mathcal{G}_2(y),$$

110 where  $\mathcal{G}_2(y)$  is a Gaussian process with covariance kernel

$$\Omega_2(y, y') = \mathbb{E}[\phi_s(y, S_i) \phi_s(y', S_i)].$$

111 This completes the proof of Step 4.

112 **Step 5.** Therefore, uniformly over  $y \in \mathcal{Y}$ , we have

$$\sqrt{n} \left( \hat{\beta}(y) - \beta(y) \right) \rightsquigarrow \mathcal{G}(y),$$

113 where  $\mathcal{G}(y)$  is a Gaussian process with covariance kernel

$$\begin{aligned}
\Omega(y, y') &= \left\{ \mathbb{E}[\pi(S_i) \phi_1(y, S_i, \mathcal{D}_i) \phi_1(y', S_i, \mathcal{D}_i)] + \mathbb{E}[(1 - \pi(S_i)) \phi_0(y, S_i, \mathcal{D}_i) \phi_0(y', S_i, \mathcal{D}_i)] \right. \\
&\quad \left. + \mathbb{E}[\phi_s(y, S_i) \phi_s(y', S_i)] \right\} / \{ \mathbb{E}[D(1) - D(0)]^2 \}.
\end{aligned}$$

114

□

### 115 C.3 Proof of Theorem 5.3: Semiparametric Efficiency Bound

116 *Proof.* Part (a). We follow the approach used in Hahn (1998) and calculate the semiparametric  
117 efficiency bound of the LDTE,  $\beta(y)$  for a given  $y \in \mathcal{Y}$ . First, we characterize the tangent space. To  
118 that end, the joint density of the observed variables  $(Y, D, Z, X, S)$  can be written as:

$$\begin{aligned} f(y, d, z, x, s) &= f(y \mid d, z, x, s) f(d \mid z, x, s) f(z \mid x, s) f(x \mid s) f(s) \\ &= f(y \mid d, z, x, s) \{\eta_z(x, s)^d \cdot (1 - \eta_z(x, s))^{1-d}\} \{\pi(s)^z \cdot (1 - \pi(s))^{1-z}\} f(x \mid s) f(s), \end{aligned}$$

119 where  $\eta_z(x, s) := P(D = 1 \mid Z = z, X = x, S = s)$  and  $\pi(s) = P(Z = 1 \mid X = x, S = s)$  for all  
120  $x \in \mathcal{X}$ .

121 Consider a regular parametric submodel indexed by  $\theta$ :

$$\begin{aligned} f(y, d, z, x, s; \theta) &= f^{11}(y \mid x, s; \theta)^{dz} f^{10}(y \mid x, s; \theta)^{d(1-z)} f^{01}(y \mid x, s; \theta)^{(1-d)z} f^{00}(y \mid x, s; \theta)^{(1-d)(1-z)} \\ &\quad \{\eta_z(x, s; \theta)^d \cdot (1 - \eta_z(x, s; \theta))^{1-d}\} \{\pi(s; \theta)^z \cdot (1 - \pi(s; \theta))^{1-z}\} f(x \mid s; \theta) f(s; \theta), \end{aligned}$$

122 where  $f^{dz}(y \mid x, s; \theta) := f(y \mid d, z, x, s; \theta)$ . When the parameter takes the true value,  $\theta = \theta_0$ ,  
123  $f(y, d, z, x, s; \theta_0) = f(y, d, z, x, s)$ .

124 The corresponding score of  $f(y, d, z, x, s; \theta)$  is given by

$$\begin{aligned} s(y, d, z, x, s; \theta) &:= \frac{\partial \ln f(y, d, z, x, s; \theta)}{\partial \theta} \\ &= dz \dot{f}^{11}(y \mid x, s; \theta) + d(1-z) \dot{f}^{10}(y \mid x, s; \theta) \\ &\quad + (1-d)z \dot{f}^{01}(y \mid x, s; \theta) + (1-d)(1-z) \dot{f}^{00}(y \mid x, s; \theta) \\ &\quad + \frac{d - \eta_z(x, s; \theta)}{1 - \eta_z(x, s; \theta)} \dot{\eta}_z(x, s; \theta) + \frac{z - \pi(s; \theta)}{1 - \pi(s; \theta)} \dot{\pi}(s; \theta) + \dot{f}(x, s; \theta) + \dot{f}(s; \theta), \end{aligned}$$

125 where  $\dot{f}$  denotes a derivative of the log, i.e.,  $\dot{f}(x; \theta) = \frac{\partial \ln f(x; \theta)}{\partial \theta}$ .

126 At the true value, the expectation of the score equals zero. The tangent space of the model is the set  
127 of functions that are mean zero and satisfy the additive structure of the score:

$$\mathcal{T} = \left\{ \begin{aligned} &dz a^{11}(y \mid x, s) + d(1-z) a^{10}(y \mid x, s) \\ &+ (1-d)z a^{01}(y \mid x, s) + (1-d)(1-z) a^{00}(y \mid x, s) \\ &+ (d - \eta_z(x, s)) a_\eta(x, z, s) + (z - \pi(s)) a_\pi(s) + a_x(x, s) + a_s(s) \end{aligned} \right\}, \quad (11)$$

128 where  $a^{dz}(y \mid x, s)$ ,  $a_x(x, s)$  and  $a_s(s)$  are mean-zero functions and  $a_\eta(x, z, s)$  and  $a_\pi(s)$  are square-  
129 integrable functions.

130 The semiparametric variance bound of  $\beta(y)$  is given by the variance of the projection of a function  
131  $\psi(Y, D, Z, X, S)$  onto the tangent space  $\mathcal{T}$ . This function must have mean zero, finite second order  
132 moment and satisfy the following condition for all regular parametric submodels:

$$\frac{\partial \beta(y; F_\theta)}{\partial \theta} \Big|_{\theta=\theta_0} = \mathbb{E}[\psi(Y, D, Z, X, S) \cdot s(Y, D, Z, X, S)] \Big|_{\theta=\theta_0}. \quad (12)$$

133 If  $\psi$  itself already lies in the tangent space, the variance bound is given by  $\mathbb{E}[\psi^2]$ .

134 Now, the LDTE is

$$\beta(y) = F_{Y(1)|C=c}(y) - F_{Y(0)|C=c}(y).$$

135 Following Lemma 3.2, it follows that

$$\begin{aligned} F_{Y(1)|C=c}(y) &= \left\{ \iint (F_{Y|D=1, Z=1, X=x, S=s}(y) \cdot \eta_1(x, s) - F_{Y|D=1, Z=0, X=x, S=s}(y) \cdot \eta_0(x, s)) f(x|s) f(s) dx ds \right\} / P_C \\ F_{Y(0)|C=c}(y) &= - \left\{ \iint (F_{Y|D=0, Z=1, X=x, S=s}(y) \cdot \eta_1(x, s) - F_{Y|D=0, Z=0, X=x, S=s}(y) \cdot \eta_0(x, s)) f(x|s) f(s) dx ds \right\} / P_C \end{aligned}$$

136 where  $P_C = \iint (\eta_1(x, s) - \eta_0(x, s)) f(x|s) f(s) dx ds$ .

137 We first need to calculate the derivative evaluated at true  $\theta_0$ :

$$\frac{\partial \beta(y; F_\theta)}{\partial \theta} \Big|_{\theta=\theta_0} = \frac{\partial}{\partial \theta} F_{Y(1)|C=c}(y; \theta_0) - \frac{\partial}{\partial \theta} F_{Y(0)|C=c}(y; \theta_0).$$

138 We have,

$$\begin{aligned} & \frac{\partial}{\partial \theta} F_{Y(1)|C=c}(y; \theta_0) \\ &= \frac{1}{P_C} \frac{\partial}{\partial \theta} \left\{ \iint (F_{Y|D=1, Z=1, X=x, S=s}(y) \cdot \eta_1(x, s) - F_{Y|D=1, Z=0, X=x, S=s}(y) \cdot \eta_0(x, s)) f(x|s) f(s) dx ds \right\} \\ & - \left\{ \iint (F_{Y|D=1, Z=1, X=x, S=s}(y) \cdot \eta_1(x, s) - F_{Y|D=1, Z=0, X=x, S=s}(y) \cdot \eta_0(x, s)) f(x|s) f(s) dx ds \right\} \frac{\partial P_C(\theta_0)}{\partial \theta}. \end{aligned}$$

139 Similarly, we have

$$\begin{aligned} & \frac{\partial}{\partial \theta} F_{Y(0)|C=c}(y; \theta_0) \\ &= -\frac{1}{P_C} \frac{\partial}{\partial \theta} \left\{ \iint (F_{Y|D=0, Z=1, X=x, S=s}(y) \cdot \eta_1(x, s) - F_{Y|D=0, Z=0, X=x, S=s}(y) \cdot \eta_0(x, s)) f(x|s) f(s) dx ds \right\} \\ & + \left\{ \iint (F_{Y|D=0, Z=1, X=x, S=s}(y) \cdot \eta_1(x, s) - F_{Y|D=0, Z=0, X=x, S=s}(y) \cdot \eta_0(x, s)) f(x|s) f(s) dx ds \right\} \frac{\partial P_C(\theta_0)}{\partial \theta}. \end{aligned}$$

140 We choose  $\psi(Y, D, Z, X, S)$  as

$$\begin{aligned} & \psi(Y, D, Z, X, S) \\ &= \left\{ \frac{Z}{\pi_1(S)} \cdot (\mathbb{1}_{\{Y \leq y\}} - \mu_1(y, S, X)) - \frac{1-Z}{\pi_0(S)} \cdot (\mathbb{1}_{\{Y \leq y\}} - \mu_0(y, S, X)) + \mu_1(y, S, X) - \mu_0(y, S, X) \right\} / \\ & \left\{ \frac{Z}{\pi_1(S)} \cdot (D - \eta_1(S, X)) - \frac{1-Z}{\pi_0(S)} \cdot (D - \eta_0(S, X)) + \eta_1(S, X) - \eta_0(S, X) \right\} - \beta(y). \end{aligned}$$

141 Then, notice that  $\psi$  satisfies (12) and that  $\psi$  lies in the tangent space  $\mathcal{T}$  given in (11). Since  $\psi$  lies in  
142 the tangent space, the variance bound is given by the expected square of  $\psi$ :

$$\begin{aligned} \Omega(y) &:= \mathbb{E}[\psi(Y, D, Z, X, S)^2] \\ &= \mathbb{E} \left[ \left( \left\{ \frac{Z}{\pi_1(S)} \cdot (\mathbb{1}_{\{Y \leq y\}} - \mu_1(y, S, X)) - \frac{1-Z}{\pi_0(S)} \cdot (\mathbb{1}_{\{Y \leq y\}} - \mu_0(y, S, X)) + \mu_1(y, S, X) - \mu_0(y, S, X) \right\} / \right. \right. \\ & \quad \left. \left. \left\{ \frac{Z}{\pi_1(S)} \cdot (D - \eta_1(S, X)) - \frac{1-Z}{\pi_0(S)} \cdot (D - \eta_0(S, X)) + \eta_1(S, X) - \eta_0(S, X) \right\} - \beta(y) \right)^2 \right] \end{aligned}$$

143 This concludes the proof of part (a).

144 Next, for part (b), under Assumption 5.1, the regression-adjusted estimator defined in Algorithm 1  
145 satisfies the following asymptotic distribution for any given  $y \in \mathcal{Y}$ :

$$\sqrt{n}(\hat{\beta}(y) - \beta(y)) \rightsquigarrow \mathcal{N}(0, \Omega(y)),$$

146 where  $\Omega(y)$  is the semiparametric efficiency bound derived in part (a). This completes the proof of  
147 part (b).

148 □

## 149 D Inference

150 We consider two approaches to estimate the standard errors and construct confidence intervals for  
151 the regression-adjusted LDTE,  $\hat{\beta}(y)$ , at a given threshold  $y \in \mathcal{Y}$ . Using the asymptotic distribution

152 derived in Theorem 5.2, we can construct a  $(1 - \alpha) \times 100\%$  confidence interval for  $\hat{\beta}(y)$  based on a  
 153 consistent estimator:

$$\left\{ \hat{\beta}(y) \pm \Phi^{-1}(1 - \alpha/2) \times \sqrt{\hat{\Omega}^2(y)/\sqrt{n}} \right\},$$

154 where  $\Phi$  is the standard normal distribution function. For a 95% confidence interval,  $\Phi^{-1}(1 - \alpha/2) =$   
 155 1.96. The consistent estimator  $\hat{\Omega}^2(y)$  is given by

$$\hat{\Omega}^2(y) := \frac{\frac{1}{n} \sum_{i=1}^n \left[ Z_i \hat{\phi}_1^2(y, S_i, \mathcal{D}_i) + (1 - Z_i) \hat{\phi}_0^2(y, S_i, \mathcal{D}_i) + \hat{\phi}_s^2(y, S_i) \right]}{\left( \frac{1}{n} \sum_{i=1}^n (\Xi_{1,i}^D - \Xi_{0,i}^D) \right)^2}, \quad \text{where}$$

156

$$\begin{aligned} \hat{\phi}_1(y, s, \mathcal{D}_i) &:= \tilde{\phi}_1(y, s, \mathcal{D}_i) - \frac{1}{n_1(s)} \sum_{j \in I_1(s)} \tilde{\phi}_1(y, s, \mathcal{D}_j), \\ \hat{\phi}_0(y, s, \mathcal{D}_i) &:= \tilde{\phi}_0(y, s, \mathcal{D}_i) - \frac{1}{n_0(s)} \sum_{j \in I_0(s)} \tilde{\phi}_0(y, s, \mathcal{D}_j), \\ \hat{\phi}_s(y, s) &:= \frac{1}{n_1(s)} \sum_{i \in I_1(s)} (\mathbb{1}_{\{Y_i \leq y\}} - \hat{\beta}(y) D_i) - \frac{1}{n_0(s)} \sum_{i \in I_0(s)} (\mathbb{1}_{\{Y_i \leq y\}} - \hat{\beta}(y) D_i), \\ \tilde{\phi}_1(y, s, \mathcal{D}_i) &:= \left[ \left( 1 - \frac{1}{\hat{\pi}_1(s)} \right) \hat{\mu}_1(y, s, X_i) - \hat{\mu}_0(y, s, X_i) + \frac{\mathbb{1}_{\{Y_i \leq y\}}}{\hat{\pi}_1(s)} \right] \\ &\quad - \hat{\beta}(y) \left[ \left( 1 - \frac{1}{\hat{\pi}_1(s)} \right) \hat{\eta}_1(s, X_i) - \hat{\eta}_0(s, X_i) + \frac{D_i}{\hat{\pi}_1(s)} \right], \quad \text{and} \\ \tilde{\phi}_0(y, s, \mathcal{D}_i) &:= \left[ \left( \frac{1}{\hat{\pi}_0(s)} - 1 \right) \hat{\mu}_0(y, s, X_i) + \hat{\mu}_1(y, s, X_i) - \frac{\mathbb{1}_{\{Y_i \leq y\}}}{\hat{\pi}_0(s)} \right] \\ &\quad - \hat{\beta}(y) \left[ \left( \frac{1}{\hat{\pi}_0(s)} - 1 \right) \hat{\eta}_0(s, X_i) + \hat{\eta}_1(s, X_i) - \frac{D_i}{\hat{\pi}_0(s)} \right]. \end{aligned}$$

157 Second, an alternative method for inference is empirical bootstrap. The procedure is summarized in  
 158 Algorithm 1.

---

**Algorithm 1** Bootstrap confidence intervals for regression-adjusted LDTE

---

**Input:** Original sample  $\{(Y_i, D_i, Z_i, S_i, X_i)\}_{i=1}^n$

**Output:**  $(1 - \alpha) \times 100\%$  confidence intervals for the regression-adjusted LDTE

---

1. For each bootstrap iteration  $b = 1, \dots, B$ :
2. Draw a bootstrap sample of size  $n$  with replacement:  
 $\{(Y_i^b, D_i^b, Z_i^b, S_i^b, X_i^b)\}_{i=1}^n$  from  $\{(Y_i, D_i, Z_i, S_i, X_i)\}_{i=1}^n$
3. Compute regression-adjusted LDTE  $\hat{\beta}(y)$  given the conditional distribution estimator based on the original sample
4. Calculate standard errors  $\hat{\Sigma}(y)$  as the standard deviation of the bootstrapped LDTEs  $\{\hat{\beta}(y)\}_{b=1}^B$ ,
5. Construct the confidence band:

$$\left\{ \hat{\beta}(y) \pm \Phi^{-1}(1 - \alpha/2) \times \hat{\Sigma}(y) : y \in \mathcal{Y} \right\},$$

where  $\Phi$  is the standard normal distribution function.

---

## 159 E Additional experimental details

160 All experiments are run on a Macbook Pro with 36 GB memory and the Apple M3 Pro chip. The  
 161 code is publicly available at [TBA later].

Table 3: Pre-treatment covariates included in regression adjustment in Oregon Health Insurance Experiment

| Variable                                                                    |
|-----------------------------------------------------------------------------|
| Number of ED visits pre-randomization                                       |
| Number of ED visits resulting in a hospitalization, pre-randomization       |
| Number of Outpatient ED visits, pre-randomization                           |
| Number of weekday daytime ED visits, pre-randomization                      |
| Number of weekend or nighttime ED visits, pre-randomization                 |
| Number of emergent, non-preventable ED visits, pre-randomization            |
| Number of emergent, preventable ED visits, pre-randomization                |
| Number of primary care treatable ED visits, pre-randomization               |
| Number of non-emergent ED visits, pre-randomization                         |
| Number of unclassified ED visits, pre-randomization                         |
| Number of ED visits for chronic conditions, pre-randomization               |
| Number of ED visits for injury, pre-randomization                           |
| Number of ED visits for skin conditions, pre-randomization                  |
| Number of ED visits for abdominal pain, pre-randomization                   |
| Number of ED visits for back pain, pre-randomization                        |
| Number of ED visits for chest pain, pre-randomization                       |
| Number of ED visits for headache, pre-randomization                         |
| Number of ED visits for mood disorders, pre-randomization                   |
| Number of ED visits for psych conditions/substance abuse, pre-randomization |
| Number of ED visits for a high uninsured volume hospital, pre-randomization |
| Number of ED visits for a low uninsured volume hospital, pre-randomization  |
| Sum of total charges, pre-randomization                                     |
| Age                                                                         |
| Gender                                                                      |
| Health (last 12 months)                                                     |
| Education (highest completed)                                               |

## 162 References

- 163 Bugni, F. A., Canay, I. A., and Shaikh, A. M. (2018). Inference under covariate-adaptive randomiza-  
 164 tion. *Journal of the American Statistical Association*, 113(524):1784–1796.
- 165 Hahn, J. (1998). On the role of the propensity score in efficient semiparametric estimation of average  
 166 treatment effects. *Econometrica*, pages 315–331.
- 167 van der Vaart, A. and Wellner, J. (1996). *Weak Convergence and Empirical Processes: With*  
 168 *Applications to Statistics*. Springer Science & Business Media.
